# Supplementary material for: Inflammatory Molecular Networks in Age-Related Meniscus Injury: TLR/NF-κB Signaling, Immune Dysregulation, and Epigenetic Modifications
Source: Research Square preprint supplement (doi:10.21203/rs.3.rs-6559896/v1), 2025-06-24
Supplement: Supplementary file 1 [file e73fa80451ca524648358050.docx]

**Supplementary tables:**

**Table S1. The primer used in qRT-PCR**

| **Gene** | **Forward Primer (5’→3’)** |
| --- | --- |
| IFNGR2 | F: GCTGGTTGAACTGGCTGATC |
|  | R: CGTGGATGATGGCAATGAAG |
| NFKBIA | F: GCTGGTTGAACTGGCTGATC |
|  | R: CGTGGATGATGGCAATGAAG |
| CCL22 | F: CAGGGACACCAGGAAGACCT |
|  | R: TGGGCTTCATGGTGAGTTCC |
| TLR3 | F: TGGGCAAACCTTCACCAACT |
|  | R: CAGGGCTTCACACACACACA |
| PLAUR | F: TGGGACCTGGTGGTCTCTAT |
|  | R: CAGCACCTCGGTAGGTGTTC |
| ITGA5 | F: GCTGGGACTGCTACCTGAAG |
|  | R: CAGGGTCCACACAGTCACCT |
| GAPDH | F: GGAGCGAGATCCCTCCAAAAT |
|  | R: GGCTGTTGTCATACTTCTCATGG |

**Table S2. The antibody used in western blot.**

| **Rabbit Gene** | **Antibody (Supplier)** | **Dilution** | **Host** |
| --- | --- | --- | --- |
| IFNGR2 | Abcam | 1:1,000 | Rabbit anti-human |
| NFKBIA | Cell Signaling | 1:1,000 | Mouse anti-human |
| CCL22 | R&D Systems | 1:500 | Rabbit anti-human |
| TLR3 | Santa Cruz | 1:800 | Mouse anti-human |
| PLAUR | Proteintech | 1:1,000 | Rabbit anti-human |
| ITGA5 | BD Biosciences | 1:800 | Mouse anti-human |
| *β-actin* | Sigma-Aldrich | 1:5,000 | Mouse anti-human |
| goat anti-rabbit IgG | CST | 1:2000 | Goat anti-rabbit |
| goat anti-mouse IgG | CST | 1:2000 | Goat anti-mouse |

**Table S3. The tissue-specific expression of DEGs.**

| **Tissue** | **Gene Counts** | **Gene Symbol** |
| --- | --- | --- |
| 721 B lymphoblasts | 26 | *MCM5, BARD1, GFPT1, LSM8, CAND1, U2SURP, TFAM, RABGGTB, SSBP1, EIF2S1, UPF3B, CCL22, CAD, HEATR1, CTAG2, CLNS1A, MED28, SRI, PEX2, CKS1B, GTPBP4, PDS5B, COX11, VTA1, MSH6, PDCD5* |
| CD33+ Myeloid | 14 | *STK38L, WASHC4, IRAK3, HK2, BCL6, IFNGR2, IL6R, RNF130, FUT4, PPM1F, NFKBIA, RASSF2, MYD88, HACD4* |
| Pineal_day | 14 | *OGA, SLC30A9, RALGAPA1, ANKMY2, DDIT4L, BEX5, SCG5, GNB3, TMX4, GABARAPL2, PTPN13, OGDHL, SLC46A3, USP11* |
| CD8+ T cells | 11 | *ANKRD36B, ATAD2B, GOLGA8A, TRMT13, ZNF292, RSBN1, ATM, YTHDC2, SLC38A1, UBP1, PPWD1* |
| Liver | 11 | *LECT2, CMBL, CTSF, CFHR4, FXYD1, SLC35D1, HP, F5, DHRS1, ISOC2, AR* |
| Whole Blood | 11 | *GBP2, CAB39, PSMB9, OSBPL8, TUT7, ACAP2, TLR1, GMFG, CTBS, ARPC3, IFNGR1* |
| CD4+ T Cell | 9 | *CREBRF, N4BP2L2, P2RY8, FYB1, IKBKB, CD6, STAT1, LAT, ZC3HAV1* |
| CD71+ Early Erythroid | 9 | *ANP32E, CMAS, TFDP2, KAT2B, ISCA1, SLC30A1, HBS1L, CD36, KEL* |
| Adipocyte | 8 | *DCN, PCOLCE2, MGP, CIDEC, CILP, G0S2, DGAT2, AKR1C1* |
| CD56+ NK Cell | 8 | *CTR9, ZNF317, ATF1, GCH1, PRPF18, KLRD1, XPA, ID2* |

**Table S4. Thirteen common DEGs shared by the inflammation-related genes.**

| **Gene Symbol** | **logFC** | **P.Value** | **P.adjust** | **Direction** |
| --- | --- | --- | --- | --- |
| *IFNGR2* | -1.1111 | 0.000664 | 0.027837 | down |
| *TLR3* | 0.95967 | 0.000668 | 0.027952 | up |
| *INHBA* | 1.542369 | 0.000872 | 0.03149 | up |
| *CCL22* | 1.503558 | 0.000973 | 0.032933 | up |
| *PLAUR* | -1.22613 | 0.000984 | 0.033064 | down |
| *BTG2* | 3.030506 | 0.001079 | 0.03366 | up |
| *NFKBIA* | 2.838884 | 0.001265 | 0.036148 | up |
| *GCH1* | -0.68595 | 0.001312 | 0.036563 | down |
| *SRI* | 1.980411 | 0.001535 | 0.039032 | up |
| *PDE4B* | -0.9349 | 0.001866 | 0.042281 | down |
| *ITGA5* | -1.00025 | 0.00247 | 0.047148 | down |
| *GPR132* | -0.64571 | 0.002694 | 0.04914 | down |
| *SELENOS* | 1.202638 | 0.002789 | 0.049773 | up |

**Table S5. The link information of top 20 KEGG pathways**

| **KEGG Pathways** | **Weighted degree** | **Degree** | **Unique genes** | **Total unique genes** |
| --- | --- | --- | --- | --- |
| Osteoclast differentiation | 29 | 27 | *NFKBIA;IFNGR2* | 2 |
| Th1 and Th2 cell differentiation | 29 | 27 | *NFKBIA;IFNGR2* | 2 |
| Th17 cell differentiation | 29 | 27 | *NFKBIA;IFNGR2* | 2 |
| C-type lectin receptor signaling pathway | 24 | 23 | *NFKBIA;CCL22* | 2 |
| Chemokine signaling pathway | 24 | 23 | *NFKBIA;CCL22* | 2 |
| cAMP signaling pathway | 24 | 24 | *NFKBIA;PDE4B* | 2 |
| Toll-like receptor signaling pathway | 22 | 22 | *NFKBIA;TLR3* | 2 |
| Adipocytokine signaling pathway | 21 | 21 | *NFKBIA* | 1 |
| Alcoholic liver disease | 21 | 21 | *NFKBIA* | 1 |
| Apoptosis | 21 | 21 | *NFKBIA* | 1 |
| B cell receptor signaling pathway | 21 | 21 | *NFKBIA* | 1 |
| Cytosolic DNA-sensing pathway | 21 | 21 | *NFKBIA* | 1 |
| IL-17 signaling pathway | 21 | 21 | *NFKBIA* | 1 |
| Insulin resistance | 21 | 21 | *NFKBIA* | 1 |
| Lipid and atherosclerosis | 21 | 21 | *NFKBIA* | 1 |
| NF-kappa B signaling pathway | 21 | 21 | *NFKBIA* | 1 |
| NOD-like receptor signaling pathway | 21 | 21 | *NFKBIA* | 1 |
| Neurotrophin signaling pathway | 21 | 21 | *NFKBIA* | 1 |
| RIG-I-like receptor signaling pathway | 21 | 21 | *NFKBIA* | 1 |
| Relaxin signaling pathway | 21 | 21 | *NFKBIA* | 1 |

Weighted degree: total shared gene; Degree: Total linked pathways.
